# Supplementary material for: Genetic Diversity and Association Mapping for Agromorphological and Grain Quality Traits of a Structured Collection of Durum Wheat Landraces Including subsp. durum, turgidum and diccocon
Source: PLoS One. 2016 Nov 15;11(11):e0166577. doi: 10.1371/journal.pone.0166577 (PMC5113043; doi:10.1371/journal.pone.0166577)
Supplement: S2 Table — (DOCX) [file pone.0166577.s003.docx]

**S2 Table**. **Sum of squares of the ANOVA for the quantitative agromorphological and the grain quality traits for 183 landraces of the subsp. *durum*, *turgidum* and *dicoccon* evaluated in four environments.**

| Source of variation | Subspecies | Environment | Subspecies x Environment |
| --- | --- | --- | --- |
|  | Quantitative agromorphological traits | | |
| Days to heading | 5024** | 98185** | 389** |
| Plant height (cm) | 11365** | 34964** | 853 |
| Spikelets per spike (number) | 885** | 263** | 6.38 |
| Days to maturity | 554** | 35827** | 40.7 |
| Δ13C | 5.22** | 4.55** | 0.59 |
| Spike length (cm)a | 13624** | - | - |
|  | Grain quality traits | | |
| Protein content (%) | 79.1** | 0.05 | 21.8 |
| Gluten strength (mm) | 21.8* | 16.9* | 0.20 |
| Vitreousness (%) | 1612** | 1527** | 3918** |
| Yellow Index | 155** | 77.5** | 1.67 |
| Thousand kernel weight (g) | 1307** | 212* | 760** |
| Test weight (kg/hl) | 41.3** | 660** | 34.5** |

*, ** significant at *P*<0.05 and *P*<0.01, respectively

a evaluated at one location
